# Supplementary material for: Highly energy-efficient and air-stable organic transistors by an ultrathin hybrid dielectric with large internal voltage generation
Source: Royal Society of Chemistry journal article supplement (doi:10.1039/c4tc00926f), 2014-01-01
Supplement: c4tc00926f1.pdf [file c4tc00926f1.pdf]

Electronic Supplementary Information

# Highly energy-efficient and air-stable organic transistors by an ultrathin hybrid dielectric with large internal voltage generation

*Yu-Wu Wang,<sup>a</sup> Guan-Yi Tseng,<sup>a</sup> Liang-Yun Chiu,<sup>b</sup> Bo-Ren Lin,<sup>b</sup> Yu-Yang Lin,<sup>a</sup> Tsu-Wei Haung,<sup>a</sup> Wei-Yang Chou,<sup>b</sup> Lance Horng<sup>c</sup> and Horng-Long Cheng<sup>b,\*</sup>*

<sup>a</sup> Institute of Photonics, National ChangHua University of Education, Changhua 500, Taiwan

<sup>b</sup> Department of Photonics, Advanced Optoelectronic Technology Center, National Cheng Kung University, Tainan 701, Taiwan

<sup>c</sup> Department of Physics, National ChangHua University of Education, Changhua 500, Taiwan

\* To whom correspondence should be addressed: e-mail: [shlcheng@mail.ncku.edu.tw](mailto:shlcheng@mail.ncku.edu.tw)

## Content

1. XPS results
2. Leakage current and capacitance properties of the dielectrics
3. In-situ Raman scattering studies of the interfacial species
4. Microstructural characterization of the pentacene films
5. Interfacial trap density ( $D_{it}$ )
6. Supporting electrical characteristics

## 1. XPS results

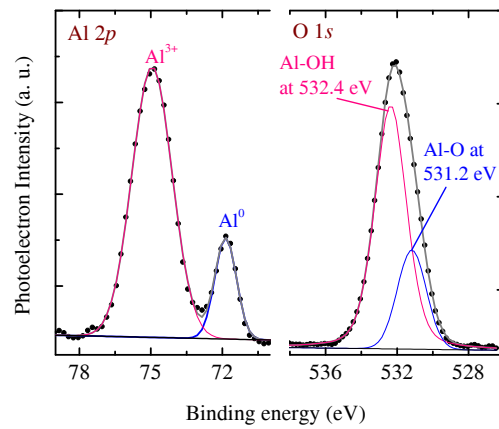

**Fig. S1** Normalized Al 2*p* and O 1*s* XPS peaks of ~ 4 nm-thick aluminum oxide films made by oxygen plasma treatment on Al metal. There are two peaks of Al 2*p*. One weaker peak at 71.9 eV indicates metallic Al and the other main peak at 74.9 eV is peculiar to fully oxidized Al.<sup>s1</sup> The O1*s* peak fit shows two peaks at 531.2 and 532.4 eV. The first peak is as attribute to oxygen in the Al-O-Al bonds, and the second to the Al-O-H bonds.<sup>s1</sup> The data confirmed the formation of the AlO<sub>x</sub> nanolayer on Al metal. (Note: XPS were recorded on an ULVAC-PHI PHI 5000 VersaProbe X-ray photoelectron spectrometer.)

## 2. Leakage current and capacitance properties of the dielectrics

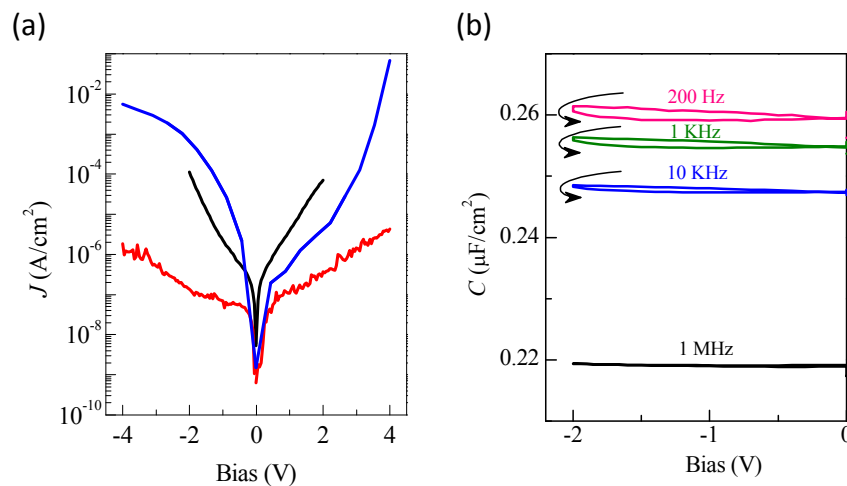

**Fig. S2** (a) Leakage current density ( $J$ ) versus applied bias of MIM diodes with different insulators: (black line) AlO<sub>x</sub>; (red line) CSDE dielectric; (blue line) crosslink-PVP (PVP:PMF of 1:4)/AlO<sub>x</sub>. (b) Capacitance ( $C$ ) versus applied bias of MIM diodes with the CSDE dielectrics operating at various frequencies.

### 3. In-situ Raman scattering studies of the interfacial species

Detecting the formation of interfacial molecules between  $\text{AlO}_x\text{-OH}$  and crosslink-PVP is possible by using in-situ Raman spectroscopy combined with quantum chemical calculations. We focused on the Raman spectral regions between  $320\text{--}420\text{ cm}^{-1}$  and  $900\text{--}1000\text{ cm}^{-1}$ , as shown in Fig. S3. During the application of a negative voltage on the Al electrode of the CSDE dielectrics sample, we could detect two considerable Raman bands centered at 393 (381) and 950 (938)  $\text{cm}^{-1}$  using a 532 nm (633 nm) excitation line (traces a and b of Fig. S3). However, the signals could not be detected with no external  $V_G$  (trace c, at the moment interfacial molecules at the neutral state) and with a positive  $V_G$  (data not shown, at the moment interfacial molecules at the anion state). The two bands cannot also be detected in the  $\text{AlO}_x$  nanolayer, either without (trace d) or with (trace e) applied voltage on an Al electrode. For the interfacial molecules at the neutral and anion states, theoretical calculations reveal very weak Raman activity (traces g and h, smaller than  $80\text{ \AA}^4/\text{amu}$  in the two regions) as compared with that of the cation state (trace f, higher than  $10^3$  and  $10^4\text{ \AA}^4/\text{amu}$  within  $320\text{--}420$  and  $900\text{--}1000\text{ cm}^{-1}$ , respectively). According to theoretical calculations of the interfacial species at a cation state, the two bands could be assigned to the vibrations involved in the Al-O-CH<sub>2</sub>-N-triazine (see the insets of Fig. S3). Pre-resonance intensity calculations support that the two bands could be largely enhanced (3.4-fold) with a 633 nm excitation as compared with that of a 532 nm excitation. If compared with off-resonance calculations, the Raman activities in the 392 and 932  $\text{cm}^{-1}$  bands show 43.7- and 3.8-fold enhancements, respectively. Theoretically, the expected Raman bands at 334, 350, and 982  $\text{cm}^{-1}$ , which are related to the vibrations of the CH<sub>2</sub> of the  $-\text{N}-(\text{CH}_2)_2\text{-O}-$  and almost independent of Al-O- vibrations, could not be detected.

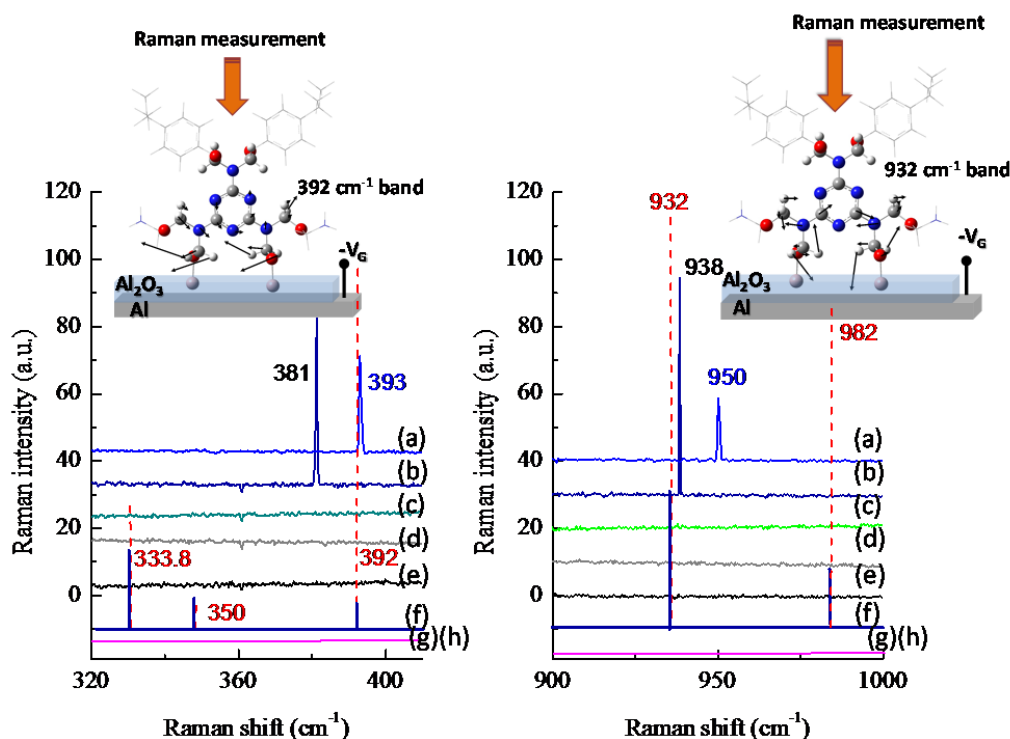

**Fig. S3** (a) and (b) are the Raman spectra of the CSDE dielectric sample with an applied  $V_G$  of -2.5 V using 532 nm and 633 nm excitation lines ( $\lambda_{\text{exc}}$ ), respectively. (c) Raman spectrum ( $\lambda_{\text{exc}} = 633$  nm) of the CSDE dielectric sample without an applied voltage. (d) and (e) are the Raman spectra ( $\lambda_{\text{exc}} = 633$  nm) of the  $\text{Al}_2\text{O}_3$  sample without and with an applied  $V_G$  of -2.5 V, respectively. (f), (g), and (h) are the theoretical Raman spectra of the interfacial molecule in the cation, neutral, and anion states, respectively, as determined from the two-layer ONIOM approach (B3LYP/6-31G(d):HF/3-21G\*). In the spectral regions from  $320\text{ cm}^{-1}$  to  $410\text{ cm}^{-1}$  and from  $900\text{ cm}^{-1}$  to  $1000\text{ cm}^{-1}$ , only the Raman bands with activity exceeding  $10^3\text{ \AA}^4/\text{AMU}$  and  $10^4\text{ \AA}^4/\text{AMU}$  are shown, respectively. The red dashed line shows the theoretical preresonance intensity with an incident light frequency of 633 nm. The vibrational modes of the  $392\text{ cm}^{-1}$  and  $932\text{ cm}^{-1}$  bands of the interfacial molecule at the cation state are also shown in the insets, respectively.

Note: Raman spectra of films were recorded using a Jobin Yvon LabRAM HR spectrometer. A 633 nm He-Ne laser and a 532 nm solid-state laser were used as excitation light sources. The spectrometer resolutions for the 633 nm and 532 nm excitation light sources were  $0.2\text{ cm}^{-1}$  and  $0.4\text{ cm}^{-1}$ , respectively.

#### 4. Microstructural characterization of the pentacene films

Pentacene films grown on the surface of CSDE dielectrics and PMMA/Al<sub>2</sub>O<sub>3</sub> dielectrics show common structural features, such as a dominant thin-film phase with a  $d_{001}$ -spacing of 15.4 Å, based on XRD measurements (see Fig. S4A). Figs. S3B and S3C show the microRaman spectra and AFM of the pentacene films, respectively. Raman spectroscopy is a powerful tool for characterizing the molecular microstructure and charge-vibrational coupling of organic films in terms of intermolecular vibrational coupling ( $w$ ) and vibrational reorganization energy ( $\lambda$ ).<sup>s2,s3</sup> To ensure efficient charge transport,  $w$  must be maximized, whereas  $\lambda$  must be minimized. The  $w$  values observed from Davydov splitting of the 1155 cm<sup>-1</sup> band, which is related to the motion of H-atoms located at the end of the pentacene molecule, are almost the same values (11.9 meV  $\pm$  0.1 meV) for both pentacene films. The pentacene films on crosslink-PVP exhibited relatively small full width at half maximum (FWHM) of the Raman bands compared with those of PMMA cases, indicating a small vibrational energy loss during the hole transport processes. Both films exhibited typical grain morphologies. For crosslink-PVP and PMMA, the pentacene films exhibited elongated grain shapes (ca. 2  $\mu$ m to 3  $\mu$ m in length) and circular grains (below 1  $\mu$ m in diameter), respectively. The results guarantee a good structural quality of pentacene films on CSDE dielectrics for charge transport.

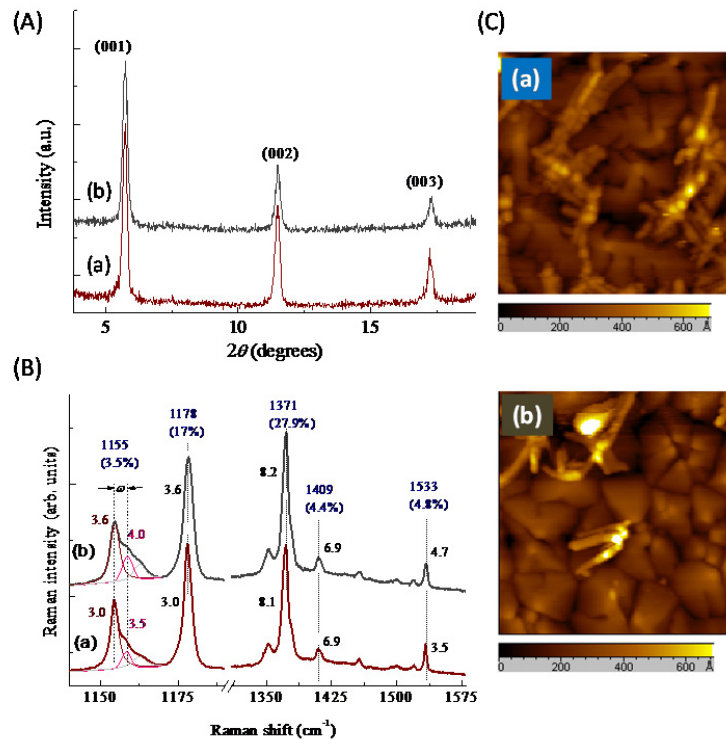

**Fig. S4** (A) XRD spectra, (B) microRaman spectra ( $\lambda_{\text{exc}} = 633$  nm), and (C) AFM images ( $3\mu\text{m} \times 3\mu\text{m}$ ) of the pentacene films grown on (a) CSDE dielectric and (b) PMMA/AlO<sub>x</sub> surfaces.

Note: XRD spectra of the specimens were produced using a Rigaku RINT 2000 diffractometer with an X-ray wavelength of 1.5406 Å and a scan step size of 0.01°. The surface morphology of pentacene films was measured by AFM (Molecular Imaging Pico Scan 2100).

## 5. Interfacial trap density ( $D_{it}$ )

Impedance-admittance analyses<sup>s4</sup> were performed to extract the  $D_{it}$  and mean interface trap time constant ( $\tau_{it}$ ); the frequency-dependent conductance at a given  $V_G$  was measured. The single time constant model was used, and the equivalent parallel conductance ( $G_p$ ) is given by

$$\frac{G_p}{\omega} = \frac{q\omega\tau_{it}D_{it}}{1 + (\omega\tau_{it})^2} \quad (s1)$$

where  $\omega$  is the angular frequency,  $q$  is the charge of the electron, and  $\tau_{it}$  denotes the mean time constant of the interface state. The maximum value of  $G_p/\omega$  occurs at  $\omega\tau_{it} = 1$ . Fig. S5 shows  $G_p/\omega$  versus frequency. The extracted  $D_{it}$  of the CSDE dielectric devices ( $9.3 \times 10^{11} \text{ eV}^{-1} \text{ cm}^{-2}$ ) is twice larger than that of the PMMA/ $\text{AlO}_x$  devices ( $4.8 \times 10^{11} \text{ eV}^{-1} \text{ cm}^{-2}$ ). However, the  $\tau_{it}$  value (2.8  $\mu\text{s}$ ) is only half of the value of the PMMA/ $\text{AlO}_x$  devices ( $\tau_{it} = 5.4 \mu\text{s}$ ). The large  $\tau_{it}$  of the PMMA/ $\text{AlO}_x$  devices indicate the presence of vacancy-related, long-lifetime charge traps within amorphous PMMA film. Thus, PMMA is shown to be an excellent charge-trapping layer on  $\text{HfO}_2$ .<sup>44</sup> On the contrary, the crosslink-PVP layer is unsuitable as a charge-trapping layer because of the denser structure resulting from the cross-linking reaction and the lack of large amounts of strong polar functional groups (i.e.,  $-\text{OH}$ ).

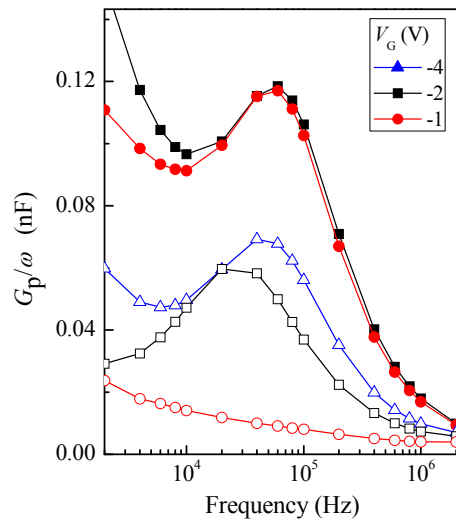

**Fig. S5**  $G_p/\omega$  versus frequency characteristics at selected  $V_G$  of the pentacene/CSDE dielectric (closed symbols) and pentacene/PMMA/ $\text{AlO}_x$  (open symbols) MISM diodes.

## 6. Supporting electrical characteristics

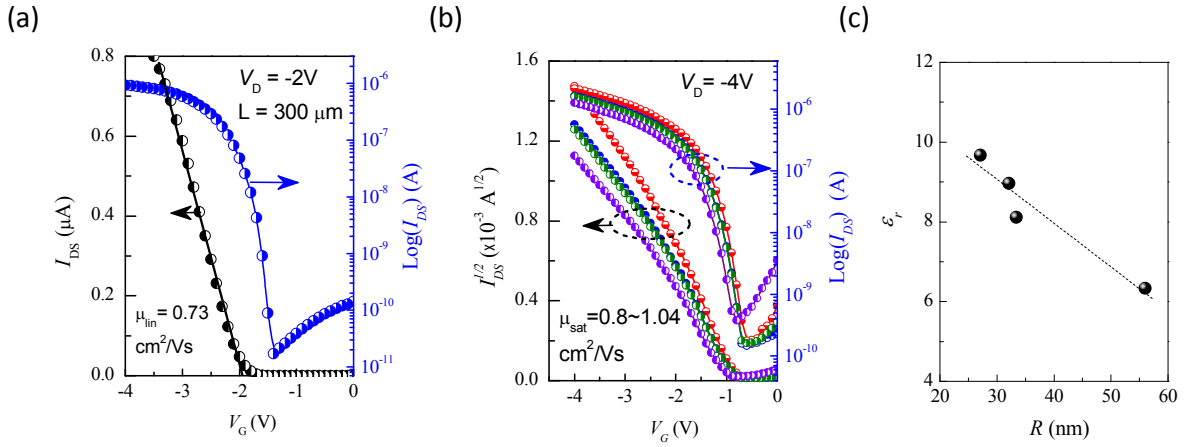

**Fig. S6** (a) Linear and (b) saturated transfer curves of pentacene OFETs (with varying channel lengths,  $L$ , and constant channel width of  $800 \mu\text{m}$ ) using the CSDE dielectrics with thicker crosslink-PVP layer (thickness of ca.  $60 \text{ nm}$ ). Symbols: (red cycles)  $L=150 \mu\text{m}$ ; (blue cycles)  $L=200 \mu\text{m}$ ; (Olive cycles)  $L = 250 \mu\text{m}$ ; (purple cycles)  $300 \mu\text{m}$ . Drain voltage ( $V_D$ ) and the extracted linear ( $\mu_{\text{lin}}$ ) and saturated ( $\mu_{\text{sat}}$ ) mobilities are also shown. (c) The dielectric constant ( $\epsilon_r$ ) varies as a function of thickness of crosslink-PVP layer ( $R$ ) of the CSDE dielectrics.

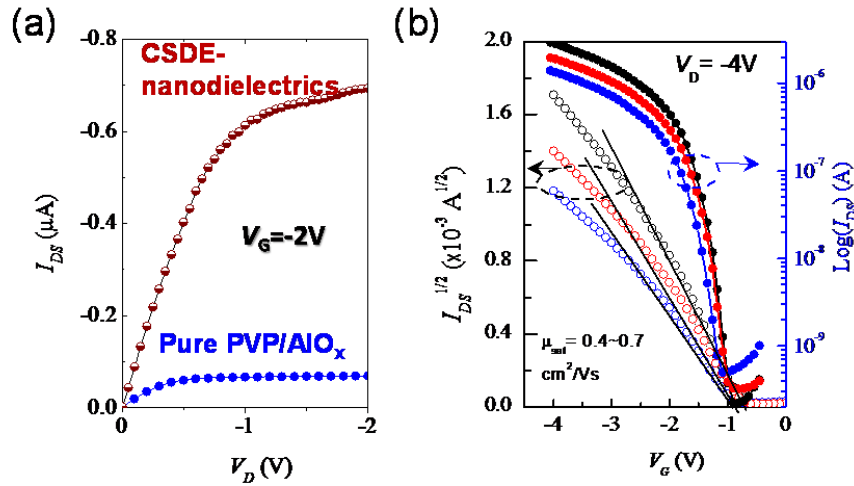

**Fig. S7** (a) Output and (b) transfer characteristics of pentacene OFETs (with varying channel lengths,  $L$ , and constant channel width of  $800 \mu\text{m}$ ) using PVP/AIO<sub>x</sub> as gate dielectrics. Symbols: (black cycles)  $L=100 \mu\text{m}$ ; (red cycles)  $L=200 \mu\text{m}$ ; (blue cycles)  $L = 300 \mu\text{m}$ . Gate voltage ( $V_G$ ), drain voltage ( $V_D$ ), and the extracted saturated mobility ( $\mu_{\text{sat}}$ ) are also shown. For comparison, output curve of pentacene OFETs with CSDE dielectrics (wine cycles,  $L=300 \mu\text{m}$ ) are shown in (a).

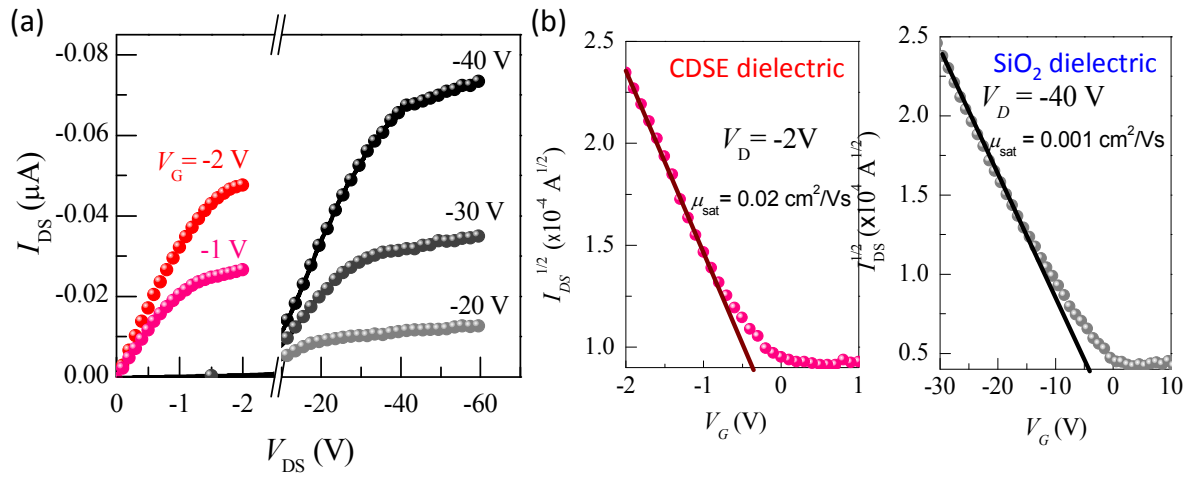

**Fig. S8** Comparison of (a) output and (b) transfer characteristics of P3HT-based FETs using SiO<sub>2</sub> (black symbols, obtained in nitrogen atmosphere) and CSDE (red symbols, obtained in air atmosphere) dielectrics as gate dielectrics. Gate voltage ( $V_G$ ), drain voltage ( $V_D$ ), and the extracted saturated mobility ( $\mu_{sat}$ ) are also shown.

## References

- s1 K. Shimizu, C. Phanopoulos, R. Loenders, M.-L. Abela and J. F. Watts, *Surf. Interface Anal.*, 2010, **42**, 1432.
- s2 H. L. Cheng, Y. S. Mai, W. Y. Chou, L. R. Chang and X. W. Liang, *Adv. Funct. Mater.*, 2007, **17**, 3639.
- s3 H. L. Cheng, X. W. Liang, W. Y. Chou, Y. S. Mai, C. Y. Yang, L. R. Chang and F. C. Tang, *Org. Electron.*, 2009, **10**, 289.
- s4 E. H. Nicollian and J. R. Brews, *MOS Physics and Technology*. Wiley, New York, 1981.
